# Supplementary material for: An Instrumented Golden Eagle’s (Aquila chrysaetos) Long-Distance Flight Behavior
Source: MDPI journal article supplement (doi:10.3390/ani12111470), 2022-06-06
Supplement: s1 [file s1]

Supplementary Table S1 Surface weather reports from NWS stations at a) Grant county Airport, WV and b) Cumberland, MD on 24 March 2016.

a)

| Date/Time                   | Temp (°F) | RH (%)    | Sky           | Vis (miles)  | WD (deg)   | WS (m/s)  |
|-----------------------------|-----------|-----------|---------------|--------------|------------|-----------|
| 3-24-2016 0:55:00           | 40        | 81        | CLR:00        | 10.00        | 250        | 3         |
| 3-24-2016 1:55:00           | 37        | 86        | CLR:00        | 10.00        | 000        | 0         |
| 3-24-2016 2:55:00           | 38        | 87        | CLR:00        | 10.00        | 000        | 0         |
| 3-24-2016 3:55:00           | 37        | 87        | CLR:00        | 10.00        | 000        | 0         |
| 3-24-2016 4:55:00           | 36        | 88        | CLR:00        | 10.00        | 000        | 0         |
| 3-24-2016 5:55:00           | 35        | 92        | CLR:00        | 10.00        | 000        | 0         |
| 3-24-2016 6:55:00           | 35        | 91        | CLR:00        | 10.00        | 000        | 0         |
| 3-24-2016 7:55:00           | 42        | 80        | CLR:00        | 10.00        | 000        | 0         |
| 3-24-2016 8:55:00           | 50        | 64        | CLR:00        | 10.00        | 000        | 0         |
| 3-24-2016 9:55:00           | 57        | 47        | CLR:00        | 10.00        | 000        | 0         |
| 3-24-2016 11:15:00          | 72        | 40        | CLR:00        | 10.00        | 130        | 10        |
| <b>3-24-2016 11:55:00**</b> | <b>74</b> | <b>35</b> | <b>CLR:00</b> | <b>10.00</b> | <b>220</b> | <b>8</b>  |
| <b>3-24-2016 12:55:00**</b> | <b>76</b> | <b>33</b> | <b>CLR:00</b> | <b>10.00</b> | <b>170</b> | <b>9</b>  |
| <b>3-24-2016 13:55:00**</b> | <b>78</b> | <b>31</b> | <b>CLR:00</b> | <b>10.00</b> | <b>190</b> | <b>10</b> |
| 3-24-2016 14:55:00          | 79        | 29        | CLR:00        | 10.00        | 210        | 14        |
| 3-24-2016 15:55:00          | 78        | 30        | CLR:00        | 10.00        | 210        | 14        |
| 3-24-2016 16:55:00          | 78        | 31        | SCT:04 90     | 10.00        | 190        | 16        |
| 3-24-2016 17:55:00          | 75        | 35        | CLR:00        | 10.00        | 160        | 13        |

\*\* - The time of the Eagle flight. 16UTC is 12:00 LST

b)

| Date/Time                   | Temp (°F) | RH (%)    | Sky           | Vis (miles)  | WD (deg)   | WS (m/s)  |
|-----------------------------|-----------|-----------|---------------|--------------|------------|-----------|
| 3-24-2016 0:55:00           | 50        | 54        | CLR:00        | 10.00        | 360        | 5         |
| 3-24-2016 1:55:00           | 46        | 66        | CLR:00        | 10.00        | 000        | 0         |
| 3-24-2016 2:55:00           | 45        | 71        | CLR:00        | 10.00        | 000        | 0         |
| 3-24-2016 3:55:00           | 43        | 81        | CLR:00        | 10.00        | 000        | 0         |
| 3-24-2016 4:55:00           | 43        | 81        | CLR:00        | 10.00        | 000        | 0         |
| 3-24-2016 5:55:00           | 41        | 81        | CLR:00        | 10.00        | 000        | 0         |
| 3-24-2016 6:55:00           | 41        | 87        | CLR:00        | 10.00        | 000        | 0         |
| 3-24-2016 7:55:00           | 45        | 76        | CLR:00        | 10.00        | 000        | 0         |
| 3-24-2016 8:55:00           | 54        | 58        | CLR:00        | 10.00        | 000        | 0         |
| 3-24-2016 9:56:00           | 59        | 45        | CLR:00        | 10.00        | 170        | 3         |
| 3-24-2016 10:56:00          | 66        | 32        | CLR:00        | 10.00        | 210        | 5         |
| <b>3-24-2016 11:56:00**</b> | <b>72</b> | <b>29</b> | <b>CLR:00</b> | <b>10.00</b> | <b>130</b> | <b>8</b>  |
| <b>3-24-2016 12:56:00**</b> | <b>77</b> | <b>28</b> | <b>CLR:00</b> | <b>10.00</b> | <b>VRB</b> | <b>11</b> |
| <b>3-24-2016 13:56:00**</b> | <b>79</b> | <b>24</b> | <b>CLR:00</b> | <b>10.00</b> | <b>160</b> | <b>9</b>  |
| 3-24-2016 14:56:00          | 79        | 24        | CLR:00        | 10.00        | 150        | 14        |
| 3-24-2016 15:56:00          | 77        | 28        | CLR:00        | 10.00        | 150        | 20        |
| 3-24-2016 16:56:00          | 77        | 28        | CLR:00        | 10.00        | 170        | 17        |
| 3-24-2016 17:57:00          | 75        | 29        | CLR:00        | 10.00        | 160        | 16        |

\*\* - The time of the Eagle flight. 16UTC is 12:00 LST

Supplementary Table S2. Clockwise circling closed circles numbered (ID) in sequence at a specific time (UTC: hr, min, sec). Dwell is time(s), Height is starting altitude (m) and Z is height gain (m) in the circle.

| Clockwise Circling |      |     |     |          |           |            |
|--------------------|------|-----|-----|----------|-----------|------------|
| ID                 | Hour | Min | Sec | Dwell(s) | Height(m) | Z gain (m) |
| 1                  | 15   | 59  | 39  | 14       | 692.2     | 11         |
| 2                  | 15   | 59  | 53  | 18       | 699.7     | 3          |
| 4                  | 16   | 02  | 24  | 9        | 798.4     | 14         |
| 5                  | 16   | 02  | 34  | 17       | 816.6     | 30         |
| 6                  | 16   | 02  | 52  | 18       | 851       | 30         |
| 7                  | 16   | 03  | 09  | 12       | 883.9     | 27         |
| 8                  | 16   | 03  | 21  | 16       | 915.4     | 37         |
| 9                  | 16   | 03  | 39  | 17       | 959.6     | 30         |
| 10                 | 16   | 03  | 55  | 17       | 991.2     | 32         |
| 11                 | 16   | 04  | 11  | 21       | 1025.2    | 30         |
| 12                 | 16   | 04  | 32  | 18       | 1057      | 34         |
| 13                 | 16   | 04  | 51  | 20       | 1093      | 35         |
| 14                 | 16   | 05  | 11  | 16       | 1128.6    | 29         |
| 15                 | 16   | 5   | 27  | 15       | 1158      | 35         |
| 17                 | 16   | 06  | 56  | 36       | 1358.9    | 0          |
| 21                 | 16   | 10  | 32  | 32       | 1478.5    | 46         |
| 22                 | 16   | 11  | 08  | 22       | 1528.9    | 18         |
| 24                 | 16   | 12  | 10  | 17       | 1626      | 26         |
| 29                 | 16   | 14  | 19  | 16       | 1932.3    | 24         |
| 36                 | 16   | 29  | 49  | 17       | 1823.9    | 52         |
| 41                 | 16   | 42  | 43  | 23       | 1549.1    | 58         |
| 42                 | 16   | 43  | 07  | 18       | 1622.8    | 73         |
| 44                 | 16   | 51  | 05  | 28       | 1530.6    | 49         |
| 45                 | 16   | 51  | 35  | 22       | 1587.7    | 29         |
| 46                 | 16   | 51  | 58  | 25       | 1620.5    | 56         |
| 47                 | 16   | 52  | 25  | 25       | 1681.4    | 40         |
| 50                 | 16   | 58  | 13  | 28       | 1727.9    | 46         |
| 51                 | 17   | 01  | 53  | 24       | 1639.6    | 61         |
| 56                 | 17   | 03  | 42  | 16       | 1877.4    | 43         |
| 58                 | 17   | 08  | 26  | 25       | 2014.2    | 52         |
| 59                 | 17   | 08  | 56  | 21       | 2083.7    | 34         |
| 60                 | 17   | 09  | 23  | 21       | 2129.3    | 30         |
| 67                 | 17   | 28  | 25  | 24       | 1556.7    | 46         |
| 68                 | 17   | 28  | 49  | 17       | 1604.1    | 34         |
| 71                 | 17   | 36  | 38  | 23       | 1453.6    | 30         |
| 73                 | 17   | 37  | 44  | 22       | 1578.7    | 40         |
| 74                 | 17   | 39  | 24  | 20       | 1745.7    | 43         |
| 77                 | 17   | 42  | 57  | 15       | 1833.2    | 30         |
| 78                 | 17   | 43  | 13  | 26       | 1868.7    | 30         |
| 79                 | 17   | 43  | 39  | 20       | 1903.4    | 30         |
| 81                 | 17   | 49  | 26  | 27       | 1887.2    | 58         |
| 82                 | 17   | 51  | 48  | 19       | 2214.5    | 53         |
| 84                 | 17   | 57  | 35  | 23       | 2146.6    | 49         |

Supplementary Table S3. As for Table S2 but for counterclockwise circling.

| Counterclockwise Circling |      |     |     |          |           |            |
|---------------------------|------|-----|-----|----------|-----------|------------|
| ID                        | Hour | Min | Sec | Dwell(s) | Height(m) | Z gain (m) |
| 3                         | 16   | 01  | 57  | 13       | 767       | 20         |
| 4                         | 16   | 2   | 10  | 14       | 782.2     | 48         |
| 15                        | 16   | 5   | 42  | 13       | 1196      | 33         |
| 16                        | 16   | 05  | 58  | 24       | 1231      | 61         |
| 18                        | 16   | 09  | 04  | 32       | 1316.3    | 46         |
| 19                        | 16   | 09  | 36  | 25       | 1362      | 46         |
| 20                        | 16   | 10  | 01  | 26       | 1413.7    | 55         |
| 23                        | 16   | 11  | 41  | 26       | 1581.7    | 26         |
| 25                        | 16   | 12  | 38  | 23       | 1668.1    | 30         |
| 26                        | 16   | 13  | 11  | 16       | 1715.7    | 46         |
| 27                        | 16   | 13  | 31  | 17       | 1782.1    | 43         |
| 28                        | 16   | 13  | 57  | 11       | 1849.2    | 37         |
| 30                        | 16   | 18  | 16  | 26       | 1629.4    | 12         |
| 31                        | 16   | 19  | 41  | 30       | 1697.9    | 34         |
| 32                        | 16   | 23  | 28  | 28       | 1723      | 53         |
| 33                        | 16   | 23  | 57  | 30       | 1779.7    | 64         |
| 34                        | 16   | 24  | 28  | 23       | 1846.9    | 11         |
| 35                        | 16   | 25  | 19  | 28       | 1905.2    | 15         |
| 37                        | 16   | 30  | 06  | 18       | 1881.5    | 46         |
| 38                        | 16   | 30  | 25  | 22       | 1932.2    | 30         |
| 39                        | 16   | 30  | 56  | 23       | 1980.2    | 43         |
| 40                        | 16   | 31  | 21  | 20       | 2034.5    | 40         |
| 43                        | 16   | 44  | 35  | 19       | 1883.2    | 37         |
| 48                        | 16   | 54  | 56  | 26       | 1712.2    | 61         |
| 49                        | 16   | 55  | 23  | 29       | 1777.2    | 79         |
| 52                        | 17   | 02  | 15  | 15       | 1697.4    | 27         |
| 53                        | 17   | 02  | 33  | 19       | 1733.4    | 49         |
| 54                        | 17   | 02  | 51  | 28       | 1783.2    | 61         |
| 55                        | 17   | 03  | 19  | 23       | 1848.1    | 24         |
| 57                        | 17   | 07  | 38  | 22       | 1897.8    | 46         |
| 61                        | 17   | 21  | 48  | 18       | 1450.1    | 15         |
| 62                        | 17   | 25  | 34  | 23       | 1309.3    | 61         |
| 63                        | 17   | 26  | 00  | 29       | 1382.2    | 61         |
| 64                        | 17   | 26  | 29  | 28       | 1445.3    | 38         |
| 65                        | 17   | 26  | 58  | 25       | 1490.3    | 24         |
| 66                        | 17   | 27  | 26  | 25       | 1514.8    | 18         |
| 69                        | 17   | 35  | 36  | 33       | 1377.2    | 46         |
| 70                        | 17   | 36  | 09  | 28       | 1427.5    | 29         |
| 72                        | 17   | 37  | 18  | 23       | 1516.9    | 53         |
| 75                        | 17   | 40  | 10  | 20       | 1842.4    | 40         |
| 76                        | 17   | 42  | 41  | 16       | 1838.9    | -6         |
| 80                        | 17   | 48  | 43  | 31       | 1780.5    | 69         |
| 83                        | 17   | 56  | 51  | 27       | 2073.9    | 24         |
| 85                        | 17   | 58  | 05  | 27       | 2223.5    | 15         |

Supplementary Table S4. Open circles identified as “meandering” with remainder as for Table S2.

| <b>Meandering</b> |             |            |            |                 |                   |                   |
|-------------------|-------------|------------|------------|-----------------|-------------------|-------------------|
| <b>ID</b>         | <b>Hour</b> | <b>Min</b> | <b>Sec</b> | <b>Dwell(s)</b> | <b>Height (m)</b> | <b>Z gain (m)</b> |
| 1                 | 15          | 59         | 01         | 38              | 679.3             | 15                |
| 2                 | 16          | 00         | 11         | 30              | 702.8             | 15                |
| 3                 | 16          | 00         | 41         | 76              | 716.9             | 46                |
| 4                 | 16          | 06         | 21         | 35              | 1292              | 61                |
| 5                 | 16          | 20         | 11         | 83              | 1732              | 13                |
| 6                 | 16          | 28         | 58         | 25              | 1642.1            | 91                |
| 7                 | 16          | 29         | 23         | 26              | 1735.3            | 84                |
| 8                 | 17          | 39         | 00         | 24              | 1685.5            | 76                |

Supplementary Table S5. Linear gliding flight with average ground speed and direction with remainder as for Table S2.

| <b>Gliding: Ascending and Descending</b> |             |            |            |                  |                   |                   |                           |                  |
|------------------------------------------|-------------|------------|------------|------------------|-------------------|-------------------|---------------------------|------------------|
| <b>ID</b>                                | <b>Hour</b> | <b>Min</b> | <b>Sec</b> | <b>Dwell (s)</b> | <b>Height (m)</b> | <b>Z gain (m)</b> | <b>Ground Speed (m/s)</b> | <b>Direction</b> |
| 1                                        | 15          | 57         | 46         | 65               | 737               | -57               | 10.5                      | 264              |
| 2                                        | 16          | 07         | 33         | 82               | 1357.8            | -38               | 16                        | 31               |
| 3                                        | 16          | 11         | 29         | 11               | 1551.2            | 28                | 15.1                      | 44               |
| 4                                        | 16          | 14         | 35         | 139              | 1956.7            | -331              | 13.7                      | Var              |
| 5                                        | 16          | 18         | 41         | 51               | 1644.5            | 55                | 11.2                      | Var              |
| 6                                        | 16          | 20         | 11         | 169              | 1732.3            | -54               | 18.9                      | 75               |
| 7                                        | 16          | 24         | 50         | 31               | 1859              | 44                | 15.4                      | 36               |
| 8                                        | 16          | 25         | 48         | 169              | 1920.9            | -280              | 19.7                      | 51               |
| 9                                        | 16          | 31         | 41         | 573              | 2072.2            | -689              | 18.7                      | 53               |
| 10                                       | 16          | 46         | 05         | 251              | 2011.8            | -518              | 19.7                      | 42               |
| 11                                       | 16          | 53         | 54         | 54               | 1705.4            | 6                 | 18.7                      | 22               |
| 12                                       | 16          | 55         | 51         | 109              | 1857.5            | -147              | 20.2                      | 28               |
| 13                                       | 16          | 58         | 40         | 145              | 1771.9            | -137              | 19.8                      | 37               |
| 14                                       | 17          | 03         | 59         | 183              | 1928.1            | -50               | 17.8                      | 24               |
| 15                                       | 17          | 07         | 59         | 23               | 1947.9            | 64                | 15.4                      | 358              |
| 16                                       | 17          | 09         | 44         | 622              | 2158.9            | -712              | 20.1                      | 23               |
| 17                                       | 17          | 22         | 05         | 183              | 1465.5            | -158              | 19.9                      | 12               |
| 18                                       | 17          | 27         | 51         | 31               | 1541              | 13                | 16.7                      | 56               |
| 19                                       | 17          | 29         | 06         | 217              | 1637.7            | -392              | 22.4                      | 22               |
| 20                                       | 17          | 37         | 00         | 15               | 1486.9            | 28                | 16.1                      | 19               |
| 21                                       | 17          | 38         | 05         | 45               | 1618.3            | 53                | 17.5                      | 23               |
| 22                                       | 17          | 39         | 44         | 20               | 1785.7            | 53                | 15.6                      | 41               |
| 23                                       | 17          | 40         | 31         | 116              | 1884.9            | -49               | 21.2                      | 22               |
| 24                                       | 17          | 43         | 59         | 244              | 1940.8            | -164              | 19.9                      | 27               |
| 25                                       | 17          | 51         | 15         | 28               | 2153.3            | 57                | 15.4                      | 45               |
| 26                                       | 17          | 52         | 06         | 244              | 2270.1            | -196              | 21                        | 39               |
| 27                                       | 17          | 58         | 33         | 301              | 2239.7            | -826              | 25                        | 20               |

Supplementary Table S6. Detailed summary of small-scale flight maneuvers used during flight (CC = counterclockwise and C = clockwise).

|                                    | CC<br>Circle | C<br>Circle | Meander | Glide<br>Up | Glide<br>Down |
|------------------------------------|--------------|-------------|---------|-------------|---------------|
| Number of classified segments      | 44           | 42          | 8       | 10          | 17            |
| Average segment time (s)           | 23.2         | 20.5        | 42.1    | 35          | 267.7         |
| Standard deviation (s)             | 5.6          | 5.3         | 23.6    | 17          | 183.6         |
| Minimum time (s)                   | 11           | 9           | 24      | 12          | 74            |
| Maximum time (s)                   | 33           | 36          | 83      | 64          | 723           |
|                                    |              |             |         |             |               |
| Average height change (m)          | 38.7         | 36.3        | 50.1    | 40          | -282          |
| Standard deviation (m)             | 18.4         | 15.2        | 32.8    | 20          | 258           |
| Minimum height change (m)          | -6.1         | 0           | 12.5    | 6           | -38           |
| Maximum height change (m)          | 79.3         | 73.2        | 91.5    | 64          | -826          |
|                                    |              |             |         |             |               |
| Average climb/descent rate (m/s)   | 1.7          | 1.8         | 1.7     | 1.4         | -1            |
| Standard deviation (m/s)           | 0.8          | 0.7         | 1.5     | 0.8         | 0.54          |
| Maximum descent rate (m/s)         | -0.4         | 0           | 0.1     | N/A         | -2.3          |
| Maximum climb rate (m/s)           | 3.43         | 4.1         | 3.7     | 2.4         | N/A           |
|                                    |              |             |         |             |               |
| Average ground speed (m/s)         | n/a          | n/a         | n/a     | 15.7        | 19.1          |
| Standard deviation (m/s)           | n/a          | n/a         | n/a     | 1.95        | 3.3           |
| Minimum average ground speed (m/s) | n/a          | n/a         | n/a     | 11.2        | 10.5          |
| Maximum average ground speed (m/s) | n/a          | n/a         | n/a     | 18.7        | 25            |
|                                    |              |             |         |             |               |
| Total time in maneuver (min)       | 17           | 14.4        | 5.6     | 5.8         | 75.8          |
| Percent total time*                | 14.0         | 11.9        | 4.6     | 4.8         | 62.6          |
| Net height change for maneuver (m) | 1702.8       | 1524.6      | 400.8   | 400.0       | -4794.0       |

\*Not including missing or unclassified segments totaling 7.7 minutes.

a)

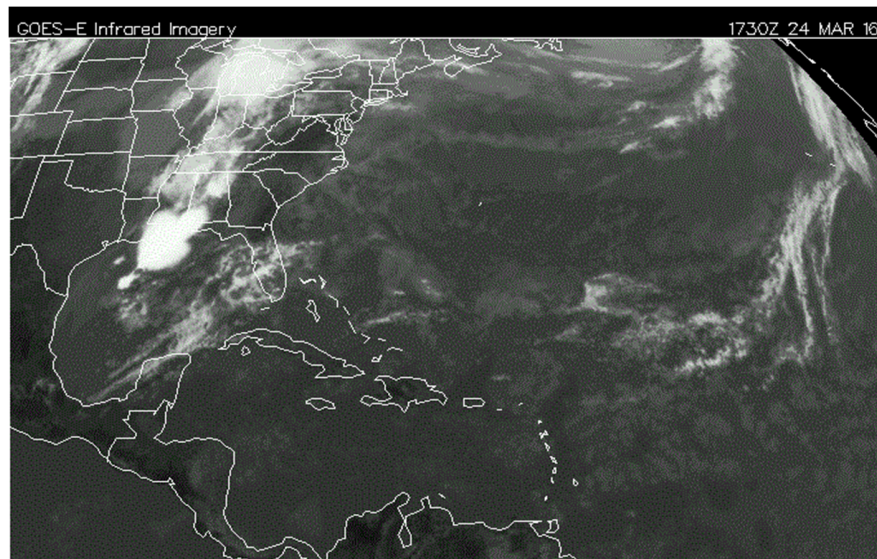

b)

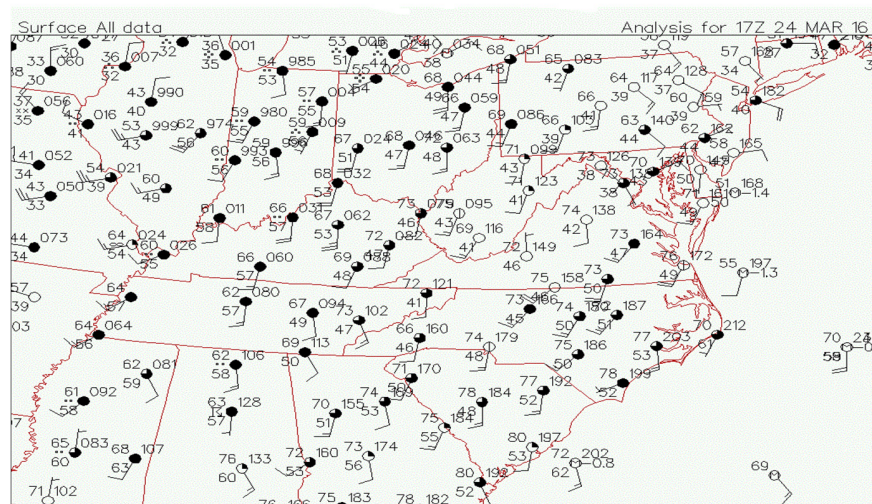

Supplementary Figure S1: GOES IR satellite imagery for 1730 UTC, 24 March 2016 (image courtesy of Plymouth State University Weather Center) (Figure S1a) and surface weather plot for 1730 UTC, 24 March 2016 (Figure S1b). Open circle means clear conditions. Weather station plots are standard synoptic symbols: top left – temperature ( $^{\circ}\text{F}$ ), top right – pressure in millibars; bottom right – dewpoint ( $^{\circ}\text{F}$ ); barb – wind direction feathers full 10 m/s; half – 5 m/s, shading (circle) degrees of sky cloud cover (image courtesy of Plymouth State University Weather Center).

a)

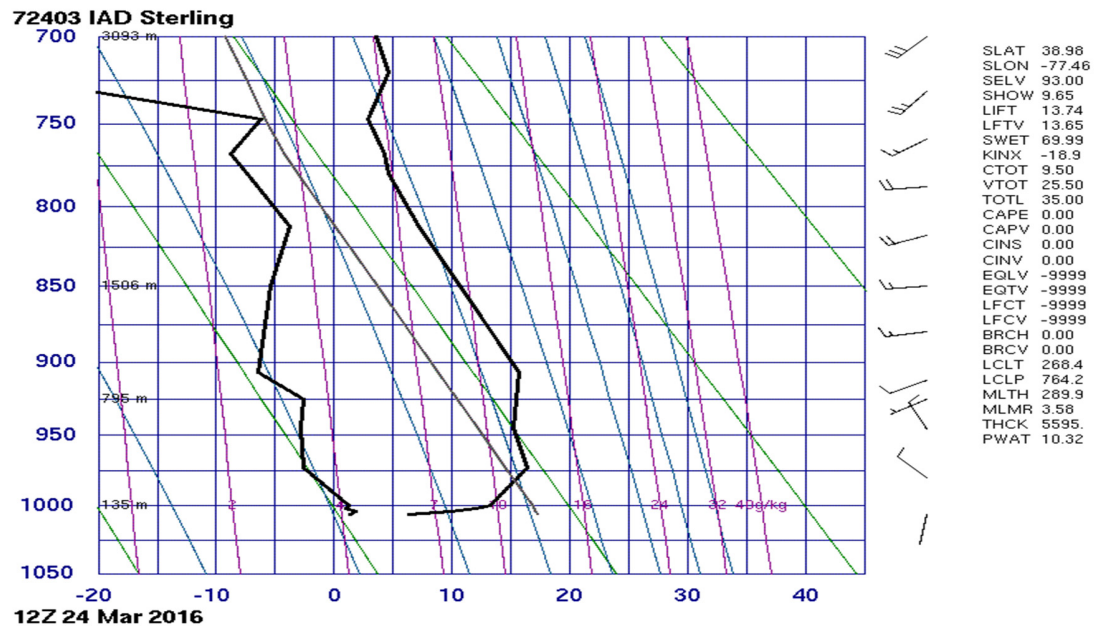

b)

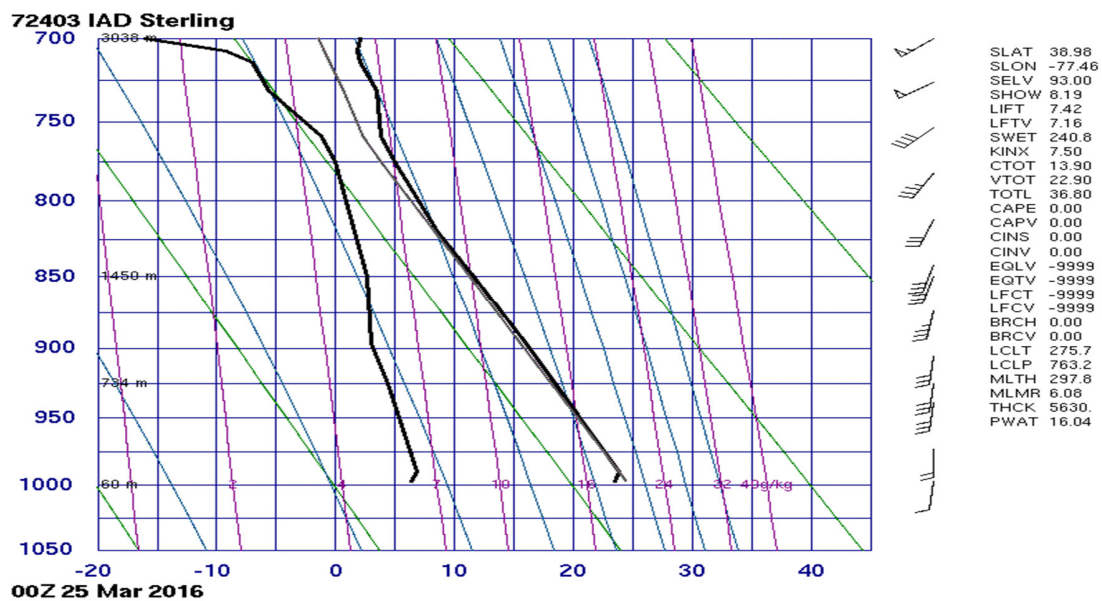

Supplementary Figure S2: Vertical sounding of temperature specific humidity and wind (right Hand side) for Dulles (IAD) at 1200 UTC on 24 March 2016 (a) and 0000 UTC on 25 March 2016 (b).



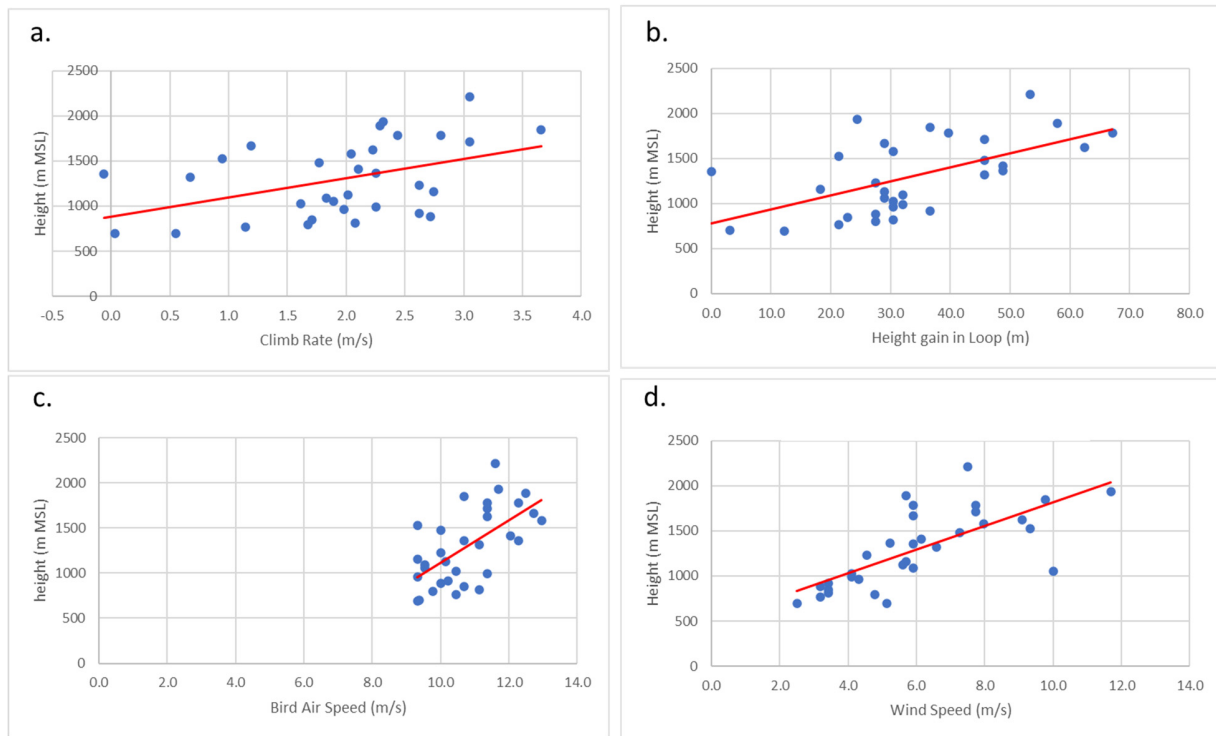

Supplementary Figure S3. Quantities derived from GPS data during the initial ascent from surface to 1900 m (Fig. 1). a) Eagle climb rate ( $\text{m s}^{-1}$ ) vs height (m ASL). Average climb rate is  $1.9 \text{ m s}^{-1}$ . b) Height gain (m) for individual circles. Average height gain is 30.6 m. c) True Air Speed (TAS) ( $\text{m s}^{-1}$ ) of the eagle within each circle as a function of height (m ASL). d) Horizontal wind speed derived from circles vs height (m ASL). Average shear =  $9.1 \times 10^{-3} \text{ s}^{-1}$ .

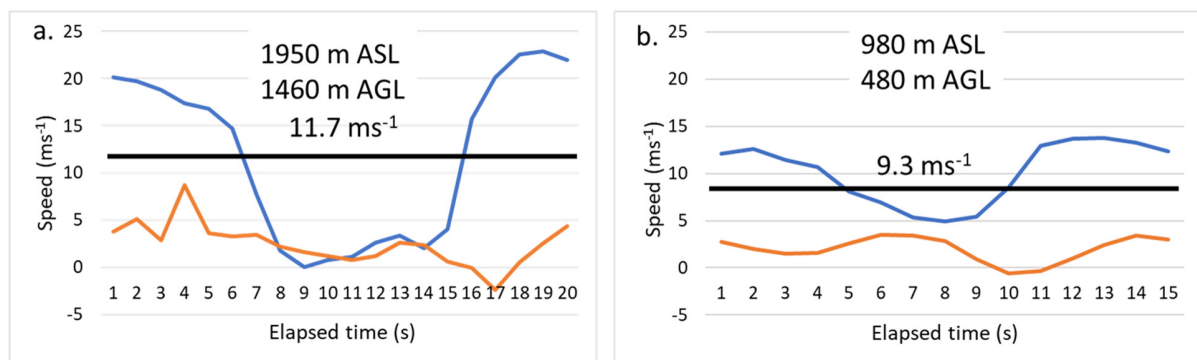

Supplementary Figure S4. Examples of the eagle's ground (blue line) and vertical speed (orange line) during circling: (a) circle near 1950 m ASL (1460 m AGL) with a mean ground speed (black line) of  $11.7 \text{ m s}^{-1}$  and (b) circle near 980 m ASL (480 m AGL) with a mean ground speed of  $9.3 \text{ m s}^{-1}$ .

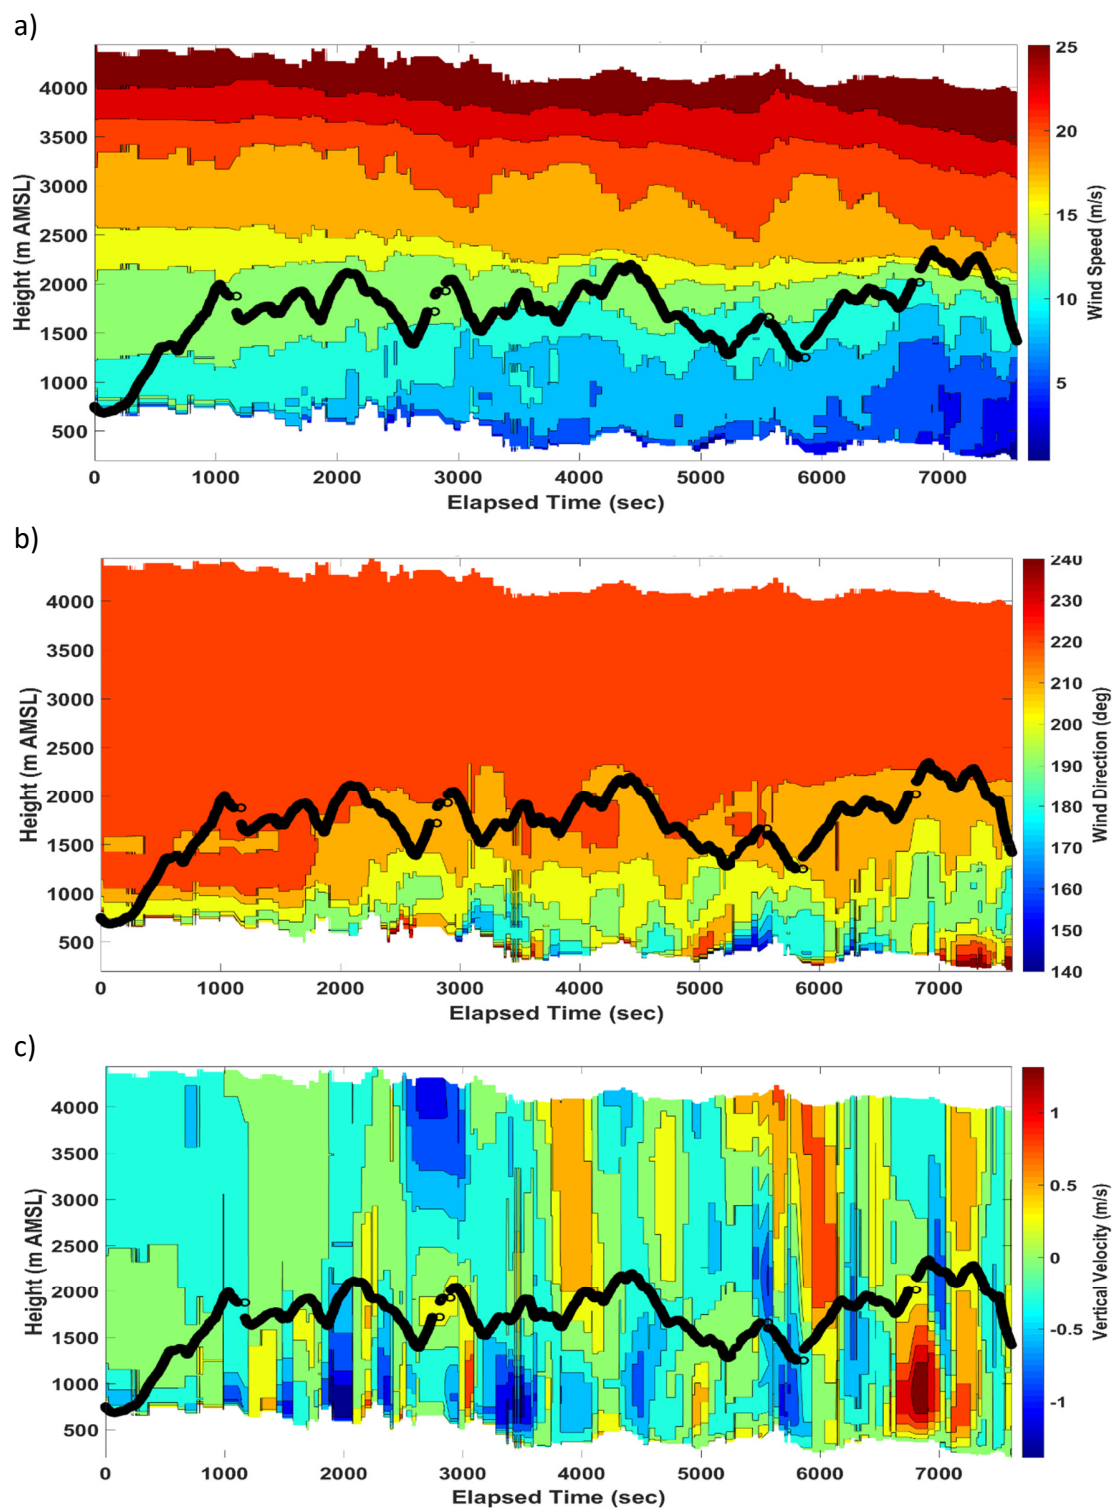

Supplementary Figure S5. WRF model Domain 3 (1 km) cross-sections of (a) wind speed, (b) wind direction and (c) vertical velocity profiles at 17 UTC along the flight path of the Golden Eagle . For each eagle waypoint, the nearest WRF model grid point profiles at 17 UTC were used.

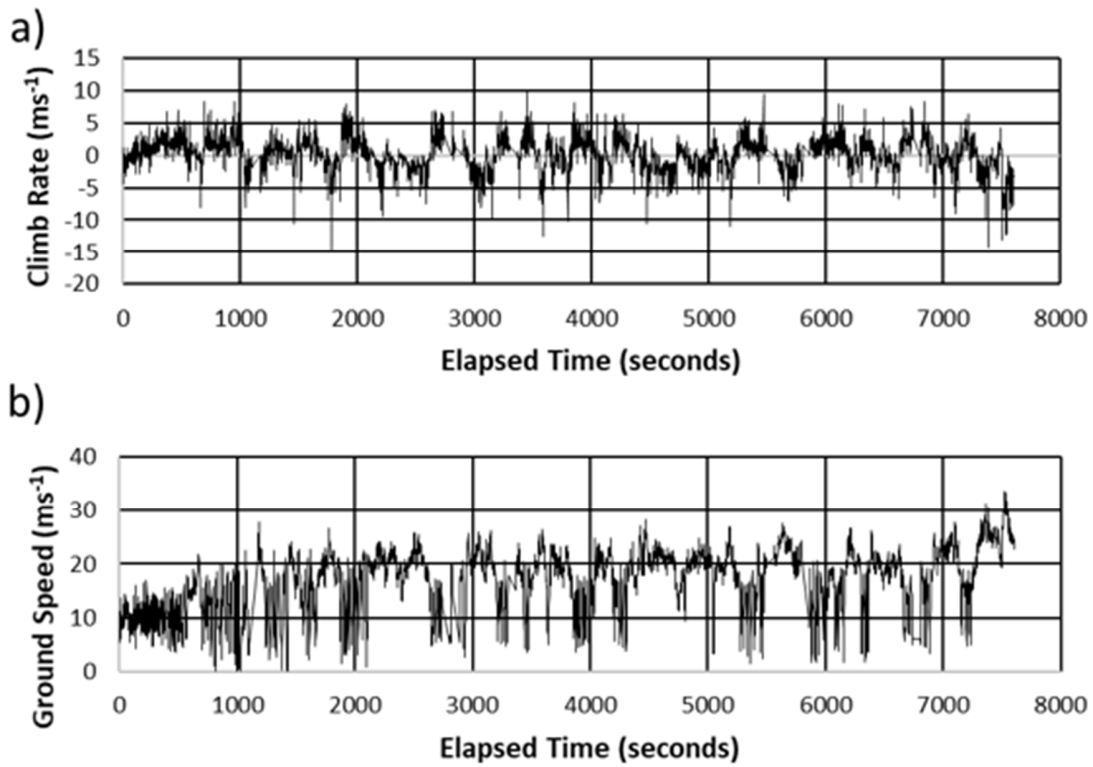

Supplementary Figure S6. (a) Eagle's climb rate in  $\text{m s}^{-1}$ ; and (b) ground speed in  $\text{m s}^{-1}$  over the entire 103.5 km eagle flight. Note: These rates assume the eagle is always flying at the optimal glide speed with a sink rate of  $-0.75 \text{ m s}^{-1}$  and the sink rate has been accounted for in figure 6a and the values plotted include the required upward motions of the atmosphere.
